# Supplementary material for: Chlorine/UV treatment of anatoxin-a by activation of the secondary amine functional group
Source: Royal Society of Chemistry journal article supplement (doi:10.1039/c9ew01112a), 2020-01-01
Supplement: c9ew01112a1.pdf [file c9ew01112a1.pdf]

Supporting Information

# Chlorine/UV Treatment of Anatoxin-a by Activation of the Amine Functional Group

Moshan Chen<sup>1</sup> and Ernest R. Blatchley III<sup>1,2,\*</sup>

<sup>1</sup>Lyles School of Civil Engineering, Purdue University, West Lafayette, IN, 47907, USA

<sup>2</sup>Division of Environmental & Ecological Engineering, Purdue University, West Lafayette, IN, 47907, USA\*Corresponding Author: Phone: 1-765-494-0316; email: [blatch@purdue.edu](mailto:blatch@purdue.edu)

Received: date; Accepted: date; Published: date

## Section S1. Preparation of [Cl-DMA] Stock solution

The stock solution of ANTX-a (fumarate) was prepared by adding 1.4-1.5 mL water from a Barnstead<sup>TM</sup> nanopure (18.2 mΩ) system directly into the vial from Cayman Chemical, contained in a 25-mL beaker on an analytical balance. Prior to use, the vial was stored in the dark at -20°C. Working solutions were freshly prepared daily from the stock solution and stored at 4°C.

Stock solutions of dimethylamine (DMA) were prepared by 100X dilution of a commercially available DMA aqueous solution (Acros, 40% wt%,  $\rho=0.890$  g/mL), stored in a sealed and dark condition, and used for a maximum of 7 days. N-chlorodimethylamine (Cl-DMA) stock solutions were directly prepared by mixing free chlorine into a solution with a known (gravimetrically determined) concentration of DMA with a Cl:N molar ratio of 0.5 (Cl:N=1:2). A DPD colorimetric test verified that under this condition, 99% of free chlorine was consumed. pH was adjusted with 0.5 M NaOH and 0.5 M HCl.

Inorganic salts including dibasic potassium phosphate (Macron Chemicals,  $\geq 99\%$ ) and monobasic potassium phosphate (Macron chemicals,  $\geq 99\%$ ), were analytical grade.

## Section S2. Operation of a Capillary UV System with Uridine as a Chemical Actinometer

The capillary UV reactor reduces the potential for loss of volatile compounds, as compared to the collimated beam UV reactor, and could be connected directly to the membrane-introduction mass spectrometry (MIMS) system to accomplish analysis and avoid loss in transfer of solution. A schematic illustration of the capillary reactor is presented in Figure S1.

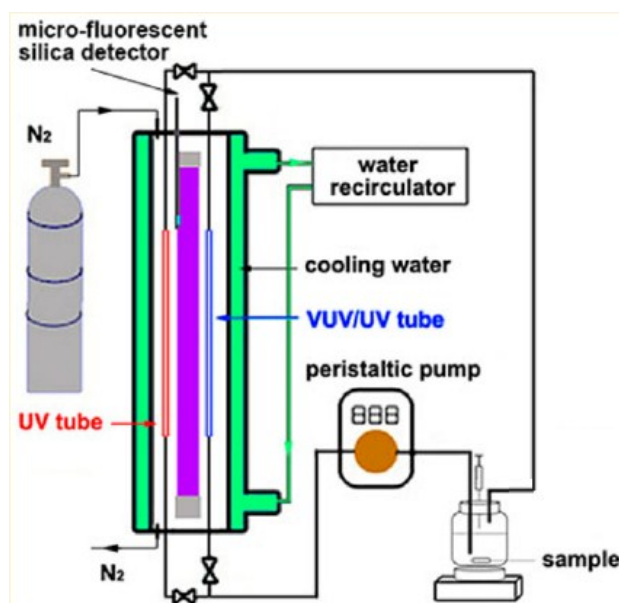

**Figure S1.** Schematic illustration of capillary UV reactor of Li et al.<sup>1</sup>. For experiments described herein, only the “UV tube” was used, which allowed exposure to radiation at a characteristic wavelength of 254 nm.

Chemical actinometry was used to measure the  $UV_{254}$  dose (D) received by the solution when flowing through the capillary UV reactor.<sup>2,3</sup> Jin et al. applied an aqueous solution of uridine (URD,  $C_9H_{12}N_2O_6$ ), with a known quantum yield and a known molar absorption coefficient at 254 nm<sup>2</sup>. Fig. S2 below illustrates the procedure described by Jin et al. and used in the present experiment<sup>2</sup>. Eq (S1) indicates that the  $UV_{254}$  dose applied to the actinometer could be indirectly calculated through the decrease in concentration of the URD actinometer<sup>2</sup>.

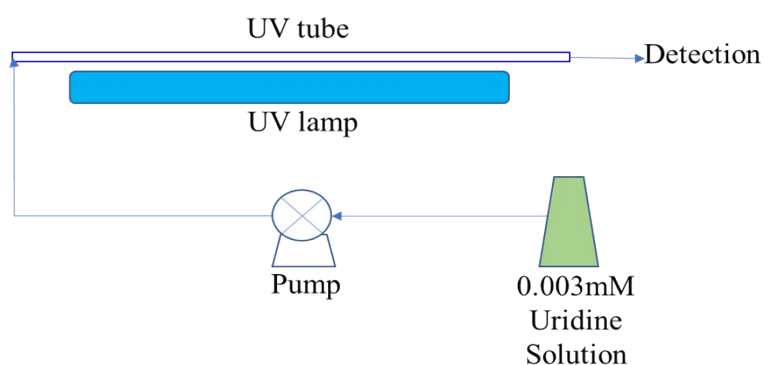

**Figure S2.** Chemical Actinometry Schematic Diagram.

$$D = \frac{\ln(A_{262nm}^0/A_{262nm})}{2.303 \times 1000 \times \epsilon_{\lambda} \times \Phi \times t} \times Q \times t \quad (S1)$$

47  
48

49 where D is the measured UV<sub>254</sub> dose, A<sub>262nm</sub> is the absorbance measured for URD at 262 nm,  
50 which corresponds to its peak and is used as a surrogate measurement for its concentration.  $\epsilon_{\lambda}$   
51 is the molar absorption coefficient of uridine at the wavelength of  $\lambda$ . To be consistent with the  
52 low-pressure UV lamp used in this and the subsequent photochemical experiments,  $\lambda$  was  
53 chosen to be 254 nm.  $\Phi$  is the quantum yield of URD, which is reported by Jin et al. as 0.020  
54 mol E<sup>-1</sup>, the mean value calculated from three published studies <sup>2</sup>. Q is the total photon  
55 energy of one einstein of photons at a given wavelength.  $Q = N_A \cdot h\nu$ , where  $N_A$  is  
56 Avogadro's constant, h is the Planck constant, and  $\nu$  is the frequency of the applied radiation.

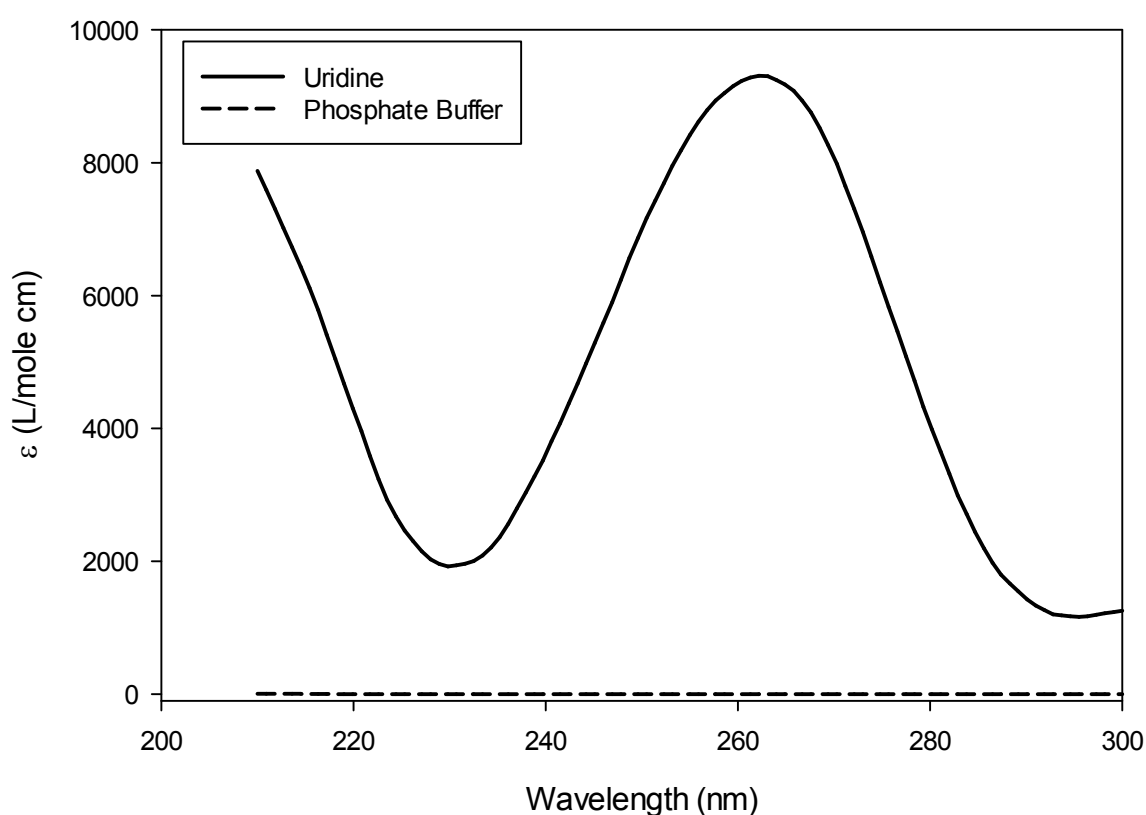

57

58 **Figure S3.** Molar absorption spectrum of uridine (pH=7.0 with 10 mM phosphate buffer,  
59 [URD]=3 μM). Also included is the absorption spectrum of the phosphate buffer.

60

61 Fig. S3 illustrates the UV absorption spectrum of URD (standard solution: [URD] =  
62 0.003 mM in 10 mM phosphate buffer, pH at 7). The peak value of  $\epsilon$  at 262 nm, which was  
63 consistent with Jin et al. (2006), was selected for spectrophotometric measurement to monitor  
64 the decrease in [URD] <sup>2</sup>. The value of  $\epsilon_{254}$  was estimated to be  $8089 \pm 334 \text{ M}^{-1}\text{cm}^{-1}$  through  
65 absorbance measurements at 254 nm, which is roughly 10% lower than the value reported by  
66 Li et al. (2016) of  $8775 \text{ M}^{-1}\text{cm}^{-1}$ .

67 For the experiments described herein, the initial concentration of uridine in solution  
68 ([URD]<sub>0</sub>) was chosen to be 3 μM, which is roughly one order of magnitude lower than the  
69 value of 0.012 mM used by Jin et al. <sup>2</sup>. The reason for selection of this low actinometer  
70 concentration was to maintain a low product of  $\epsilon \cdot [\text{URD}] \cdot l$ . In such case, solution absorbance  
71 (A<sub>254</sub>) was maintained below a value of < 0.02, thereby guaranteeing first-order

photochemical decay<sup>4</sup>. This was also the value of  $A_{254}$  used in experiments involving other chemicals in the capillary reactor, thereby guaranteeing identical  $UV_{254}$  exposure among experiments with this system for a given flow rate.

A key condition in the use of eq (S1) is a known quantum yield ( $\Phi$ ). Jin et al. reported a quantum yield of 0.020 mol/E, which was the average of three published values<sup>3,5,6</sup>. The quantum yield was estimated independently by the use of a collimated beam UV reactor. Fig. S4 shows the first-order photochemistry of URD under  $UV_{254nm}$  irradiation with this collimated beam system.

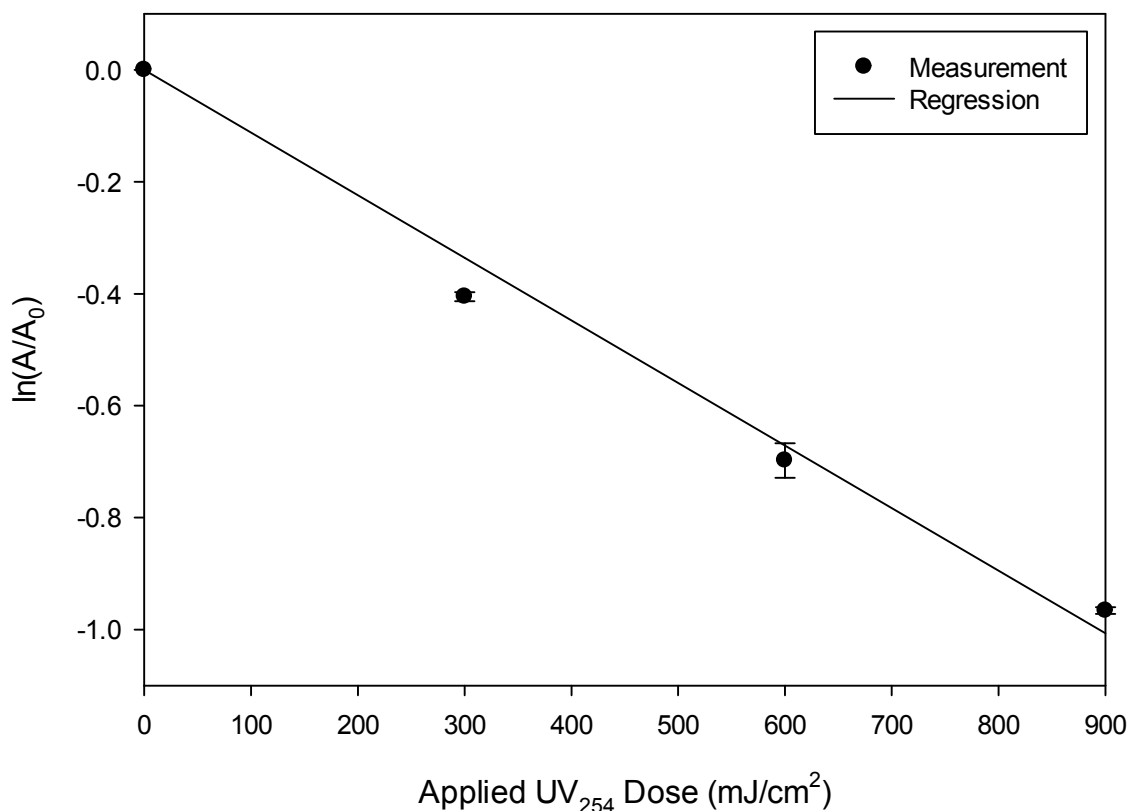

**Figure S4.** First-order photodecay of URD under  $UV_{254nm}$  irradiation (pH=7.0,  $[URD]_0=3 \mu M$ ,  $T=25^\circ C$ , error bars represent standard deviation of three replicates). Regression was based on an assumed linear relationship between  $\ln(A/A_0)$  and applied dose ( $R^2 = 0.995$ ).

Based on the small optical density ( $A(\lambda) < 0.02$ ), the quantum yield of URD was thus estimated as  $0.028 \pm 0.001$  mole/Einstein by eq (S1). Since the rate of photochemical reaction is always governed by the product of  $\epsilon \cdot \Phi$ , we assumed that the cause of a higher quantum yield we obtained (as compared with previous studies) to be attributable to the lower molar absorptivity values we observed than were previously reported.

Repeatable flow rates were achieved in the experiments by defining pump settings that yielded flow rates of 2.0, 3.0, 4.0, 5.0, 6.0, 7.0, and 8.0 mL/min, and pre-checked by measuring the volume of water passing through the UV lamp in 1 min. It was assumed that the  $UV_{254}$  output of the Hg lamp used in the capillary flow reactor was constant, and that because of this the  $UV_{254}$  dose delivered to the fluid flowing through the reactor was controlled by flow rate. It was hypothesized that the inverse of flow rate was linearly correlated with the UV dose; this hypothesis was supported by the data presented in Fig. S5.

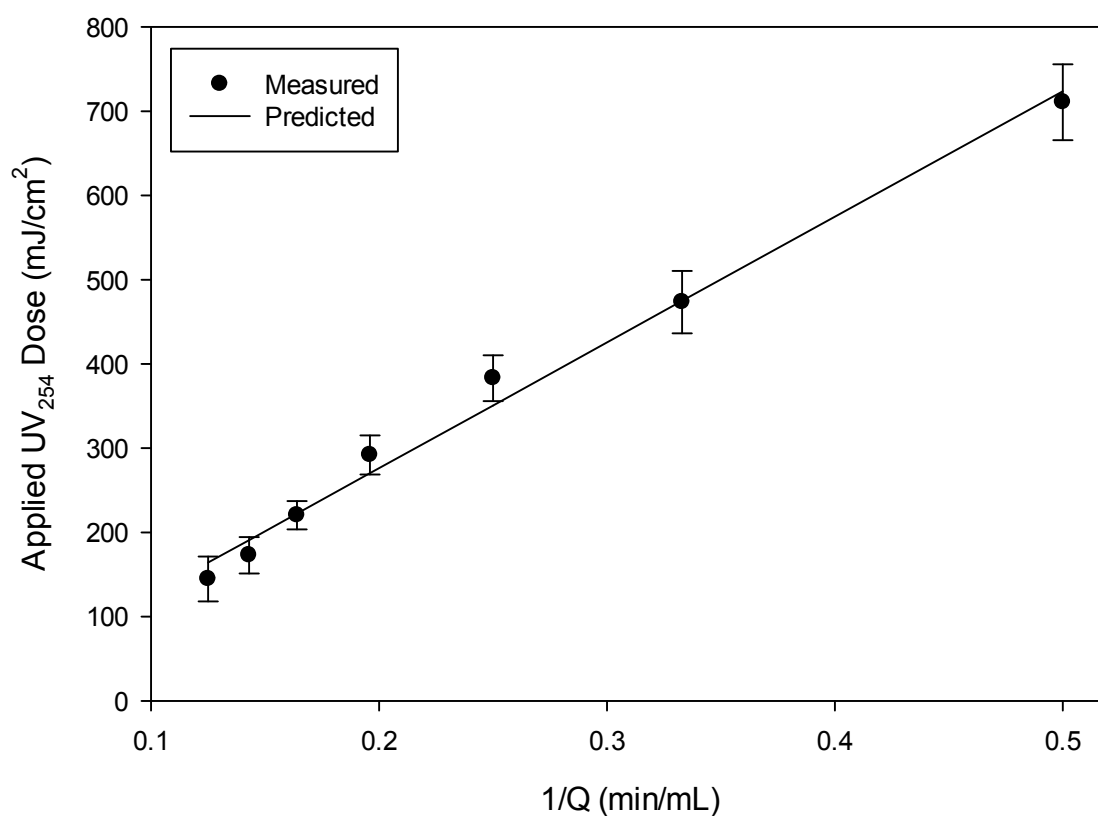

**Figure S5.** Observed linear relationship between the inverse of flow rate and applied UV<sub>254</sub> dose delivered by capillary photoreactor, as measured by uridine actinometry (pH=7.0, [URD]<sub>0</sub>=3 μM, T=25 °C, error bars represent standard deviation of three replicates; R<sup>2</sup> = 0.990).

### Section S3. Membrane Introduction Mass Spectrometry (MIMS)

The MIMS system used in this study was based on an Agilent 6850 bench top GC/MS, comprising an Agilent 5975C quadrupole mass selective detector (MSD) with electron (70 eV) ionization. As described in Shang and Blatchley (1999), the membrane cell was constructed around small-diameter silicone tubing, with a liquid flow rate of 0.7 mL/min, and gas (Helium) flow rate at 0.5 mL/min<sup>7</sup>. Volatile reaction products were identified in mass spectrum scan mode ( $m/z$ : 49-400 amu), while selected ion monitoring (SIM) mode was applied for quantification of target precursors.

In the operation of MIMS connected with a capillary UV system, the stock solution of Cl-DMA was sealed with multiple layers of Parafilm (Flinn Scientific) and injected into the capillary UV reactor operated at a flow rate of 2 mL/min, with the UV lamp off. 10 mins of injection were conducted before collection of treated solution, to avoid any influence caused by adsorption on the tubing system. The UV lamp was then warmed for at least 20 min. Flow rates of 8.0, 5.0, 3.0, and 2.0 mL/min were then established by using the pre-calibrated settings on the pump, and the solution was injected into the capillary UV reactor. After injecting the solution for 5 minutes, the output of the UV reactor was diverted to MIMS, after which 20 mins was allowed to reach a steady-state abundance in the SIM mode on MIMS.

The concentration of Cl-DMA in the stock solution should be identical to the concentration of free chlorine added to the solution,  $[Cl_2]_0$ ,  $7.04 \times 10^{-5}$  M. Solutions of  $3.52 \times 10^{-5}$  M and  $1.76 \times 10^{-5}$  M Cl-DMA were prepared by diluting the stock Cl-DMA solution. Standard curves of [Cl-DMA] on MIMS were prepared by injecting different concentrations of Cl-DMA into MIMS and obtaining the steady-state abundance in the SIM mode. The abundance at  $m/z=78$  in the SIM mode was demonstrated to be linearly correlated to the Cl-DMA concentration in solution (Fig. S6). Note that the abundance detected on MIMS for the same solution varied considerably as functions of liquid flow rate or pressure; therefore, each application of MIMS required a new standard curve. Therefore, the curve presented in Fig. S6 is included to illustrate that the abundance was linearly dependent on the concentration. Notice also that in the experimental range of solution concentrations, the abundance was in the range of  $10^3 \sim 10^4$ .

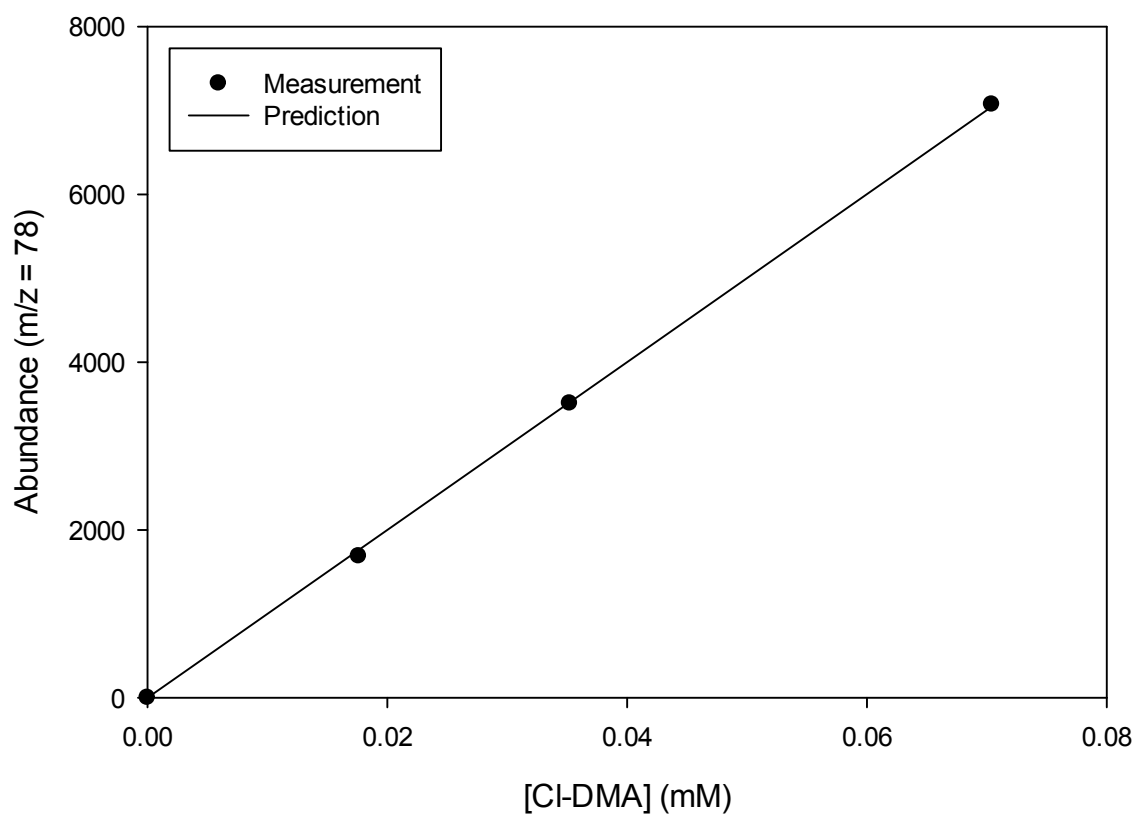

**Figure S6.** Standard Curve for Cl-DMA on MIMS ( $[\text{Cl-DMA}]_0 = 7.04 \times 10^{-5} \text{ M}$ , corresponding to 5 mg/L  $[\text{Cl}_2]$ , pH=7.0, T=25 °C;  $R^2 = 0.998$ ).

140 **Section S4. DPD and DPD/KI standard curves**

141 The DPD and DPD/KI colorimetric methods were well-suited for measuring the free  
142 available chlorine (FAC) and +1 valent combined chlorine concentration in aqueous solution.  
143 The DPD solution, DPD buffer solution, and experimental procedures were prepared and  
144 applied according to *Standard Methods* <sup>8</sup>. Fig. S7 shows one calibration curve of the  
145 compound Cl-DMA developed by the DPD/KI method.

146

147

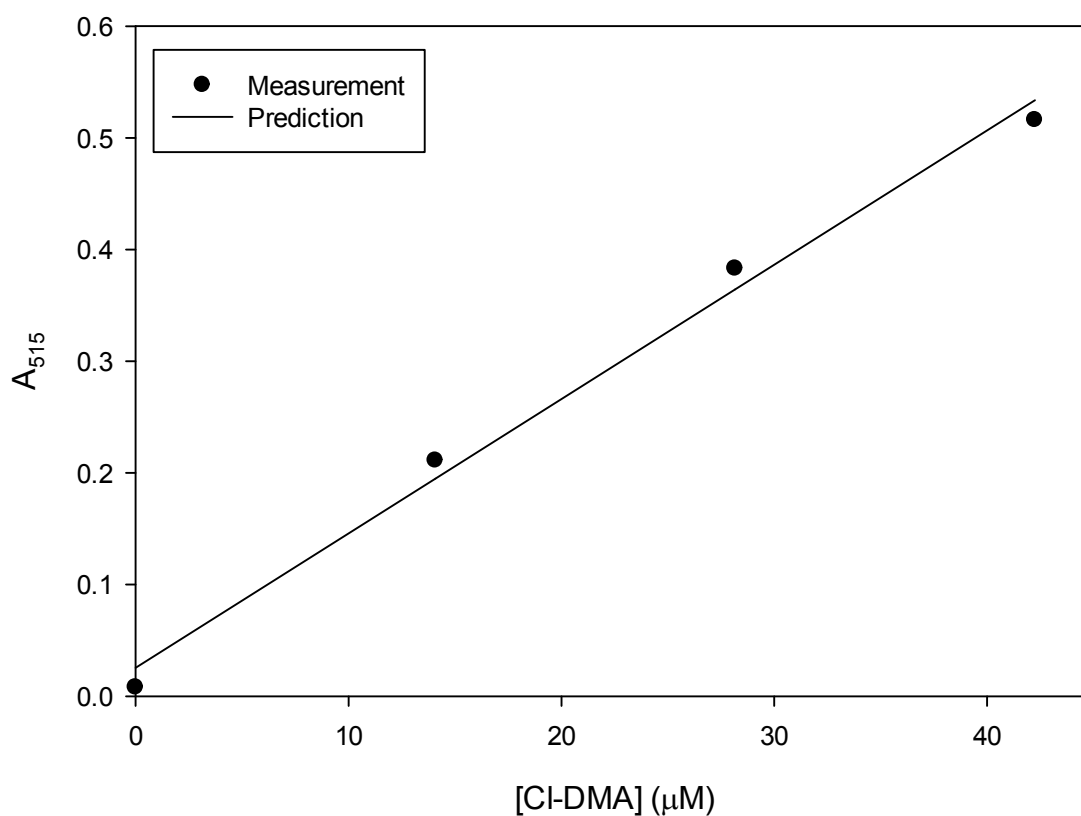

148

149

150 **Figure S7.** Example DPD/KI Colorimetric Method Standard Curve for Cl-DMA.

151

152

153 **Section S5.** Standard Curves of Fumaric Acid and Anatoxin-a on HPLC. Note that that the  
154 horizontal axis represents the concentration of ANTX-a (Fumarate) in both figures S9 and  
155 S10.

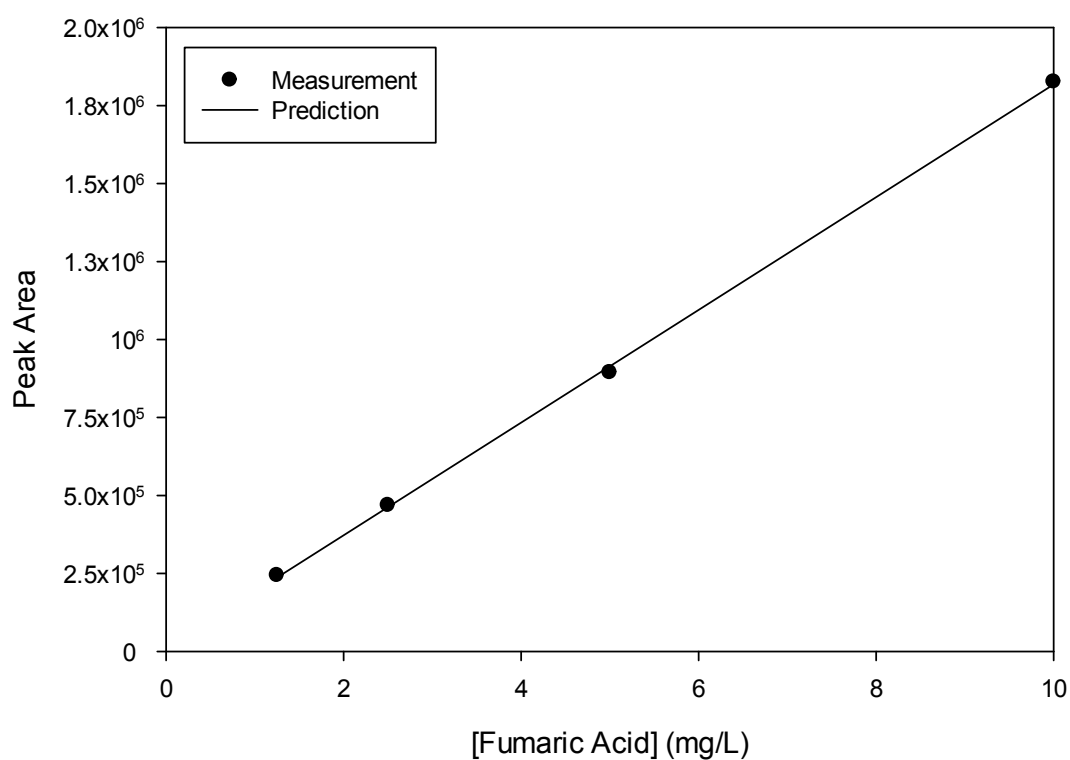

156 **Figure S8.** Standard curve for Fumaric Acid in HPLC analysis.  
157

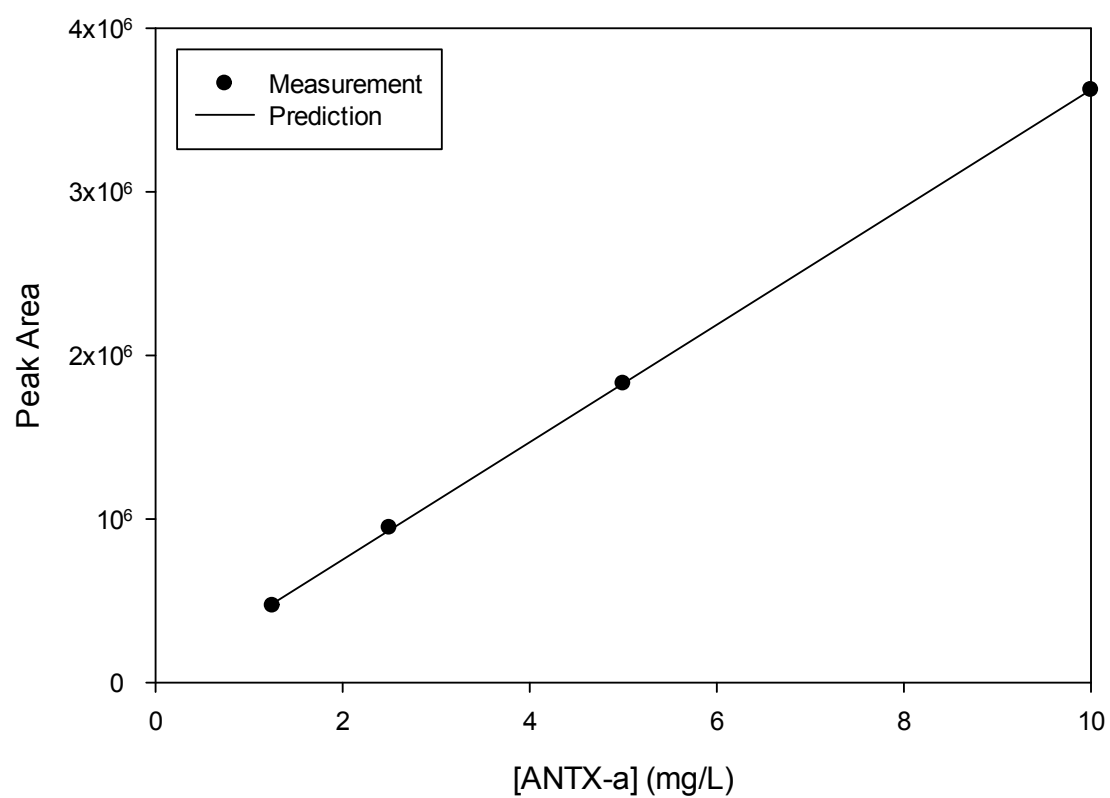

**Figure S9.** Standard curve for ANT-X-a in HPLC analysis.

161 **Section S6.** Absorption Spectra of DMA and Cl-DMA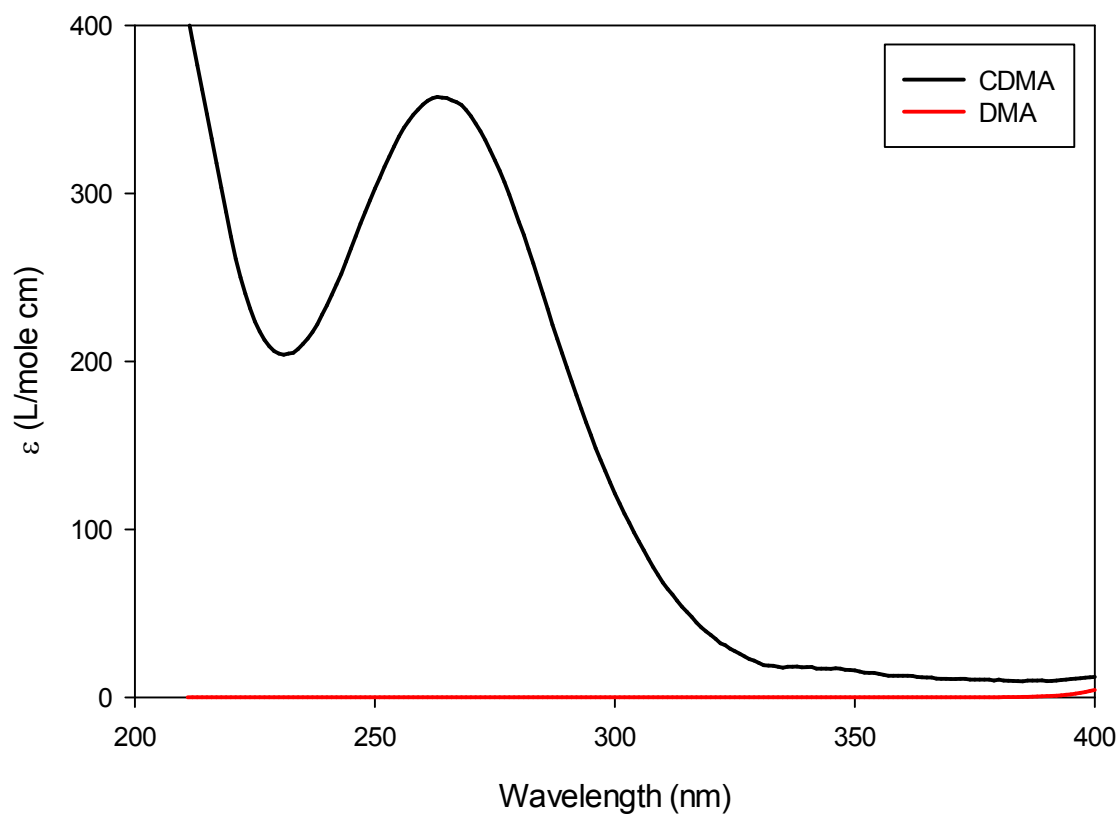

162  
163  
164 **Figure S10.** Absorption spectra of DMA and Cl-DMA at pH = 7.0 (Cl:N = 1:2 molar  
165 ratio).  
166  
167

## Section S7. Chlorine Demand of ANT-X-a

In a set of experiments with a Cl:N molar ratio of 5, the peak area readings by HPLC analysis indicated that no detectable ANT-X-a existed in the bench reactor within 30 seconds of chlorination. This is conflict with the reported results from Rodriguez et al.<sup>9</sup>. When sodium thiosulfate was added to the solution to quench the chlorine, the peak of ANT-X-a returned to its original form (Fig. S11). A subsequent set of experiments indicated that with a Cl:N molar ratio of 1.0, 90% of free chlorine was depleted within 1 min, and over 99% of free chlorine was depleted within 10 min; however, when a KI crystal was added to the solution, the solution instantly became pink and a stable reading at 515 nm was obtained. As described in Section S4, this is an indication that +1 valent chlorine existed in the solution in the form of combined chlorine. These observations indicated that the behavior of ANT-X-a in chlorination is quite similar to DMA, in that electrophilic substitution occurred at the secondary amine structure, resulting in formation of an N-Cl bond. Therefore, it became apparent that the chlorination of ANT-X-a is a rapid process, but such effect could be masked by the addition of thiosulfate, as used by Rodriguez et al.<sup>9</sup>.

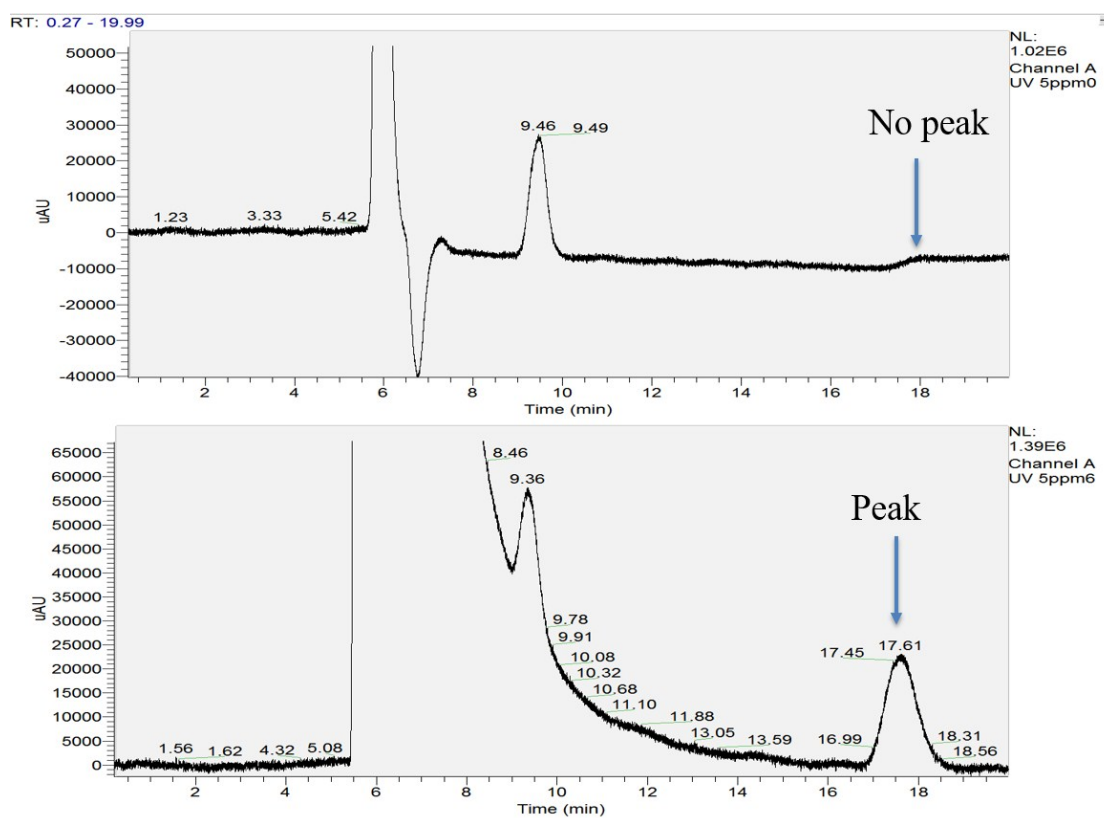

**Figure S11.** Recovery of the ANT-X-a HPLC peak of by addition of sodium thiosulfate.

To further support this, we analyzed for the formation of Cl-ANT-X-a by the DPD/KI colorimetric method. In a set of experiments with different concentrations of ANT-X-a and free chlorine, but constant Cl:N ratio of 1.4, DPD/KI analysis was conducted after mixing ANT-X-a and free chlorine for 10 min. At this point, no free chlorine was detected in either of these solutions. However, after adding KI crystals, the pink color appeared instantly and a stable reading at 515 nm was obtained for each solution. Therefore, in these solutions, we regarded that the concentrations of Cl-ANT-X-a were identical to that of the original ANT-X-a, 0, 0.8, 1.7, 3.5  $\mu$ M.

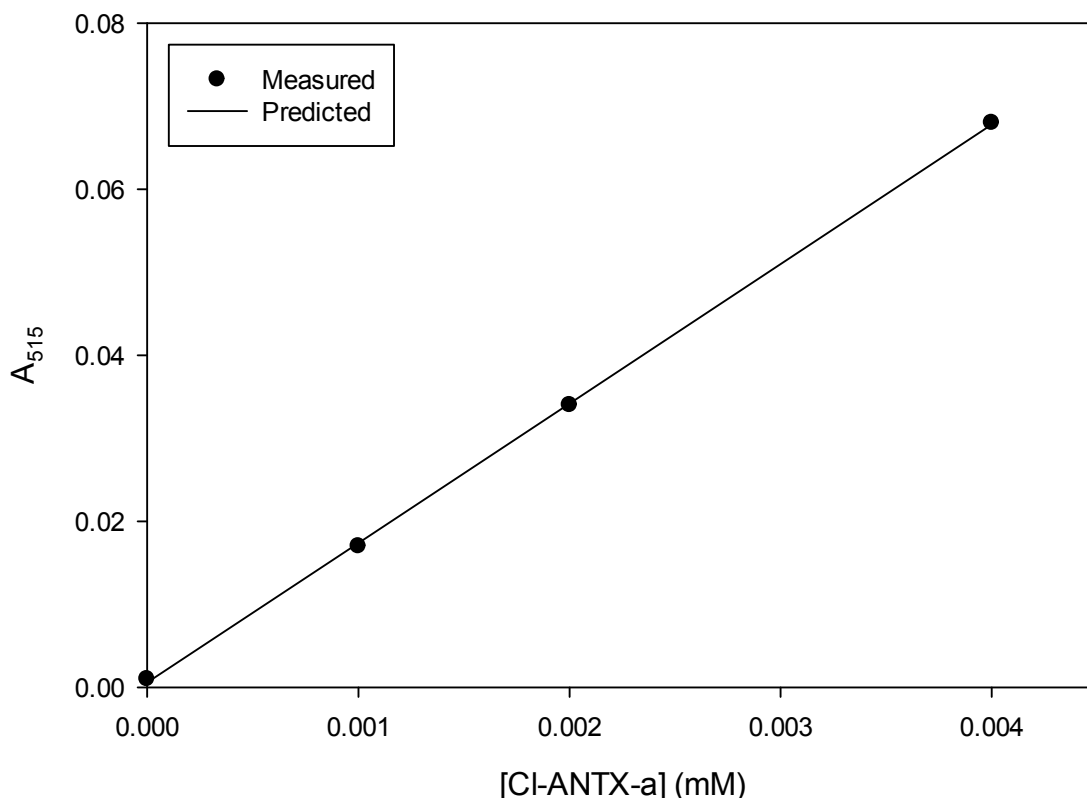

**Figure S12.** Standard Curve for Cl-ANTX-a by DPD/KI Colorimetric Method

Several bench experiments involving 11 mL of working solution with a Cl:N molar ratio of 1~2 were prepared. The HPLC was used to observe the disappearance of ANTX-a, while DPD and DPD/KI colorimetric methods were used to detect residual free chlorine and combined chlorine. In a typical experiment, the initial concentration of ANTX-a (Fumarate) was 5 mg/L (0.0178 mM), pH was adjusted at 7 by NaOH or HCl in the presence of 10 mM phosphate buffer, at room temperature (~22°C). 1 mL of the working solution was rapidly transferred into an HPLC vial and analyzed every 20 minutes. The rest of the solution was kept in the dark in a brown container. When the peak area of ANTX-a became stable in two successive HPLC analyses, and when the peak area of ANTX-a became unreadable in HPLC chromatogram in two successive analyses, a DPD measurement was applied on the rest of the solution to check the existence of residual free chlorine.

Since it had been shown that there was no free chlorine in the 1:1 scenario, and about 25% of [ANTX-a]<sub>0</sub> still remained in the solution (Fig. S13), it was assumed that the approximate free chlorine demand of ANTX-a was 1.3~1.4 times [ANTX-a]<sub>0</sub>, on a molar basis.

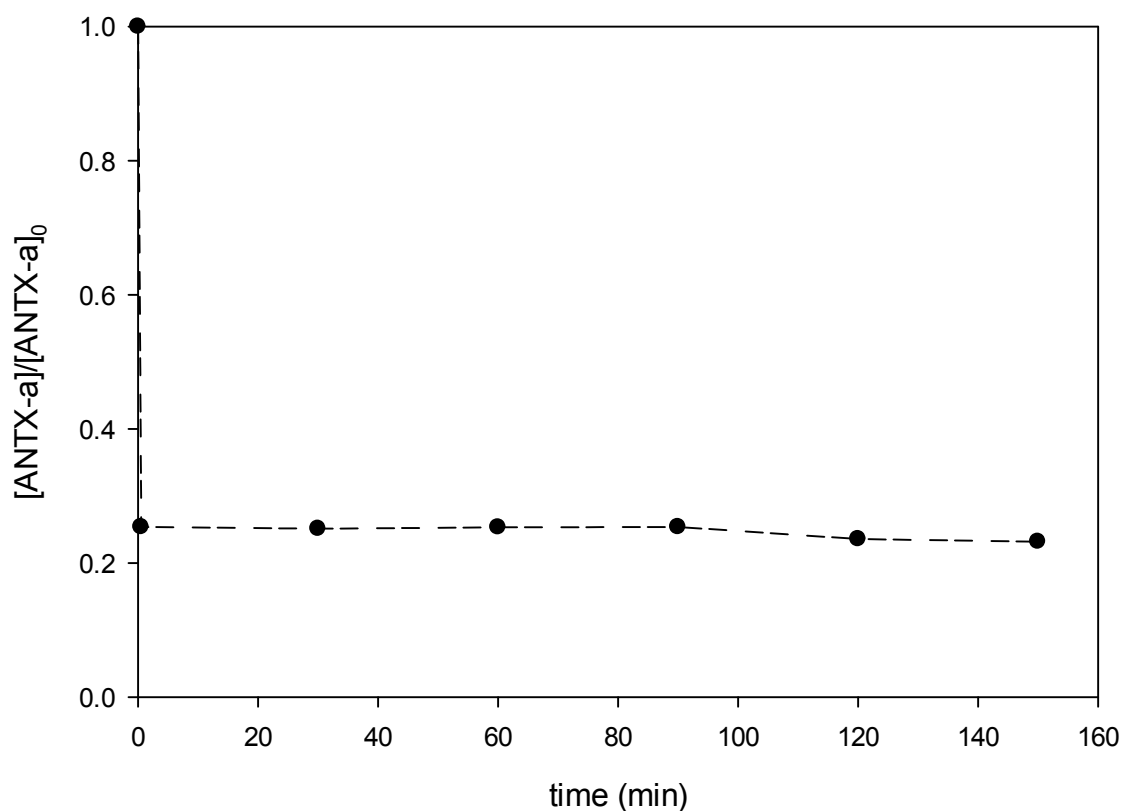

**Figure S13.** ANTX-a loss in Cl:N= 1:1 scenario.

To specify the chlorine demand of ANTX-a, two more sets of experiments involving chlorination of ANTX-a were conducted. 1 mL of solution was transferred quickly into an HPLC vial and analyzed every 20 min. In the scenario of Cl:N=1.3:1, successive analyses at 40 and 60 min showed essentially identical peak areas on the HPLC, and the analysis was stopped. The DPD colorimetric method results indicated that at both times, the solution after adding 0.5 mL DPD was transparent, and the  $A_{515}$  value was zero. In the scenario of Cl:N=1.4:1, two successive analyses at 40 and 60 min showed no detectable peak by HPLC and the analysis was stopped. DPD colorimetric method results also indicated that at these times, no free chlorine was present. Therefore, the free chlorine demand was assumed to be roughly 1.4:1 on a molar basis.

228 **Section S8.** Control group experiments.

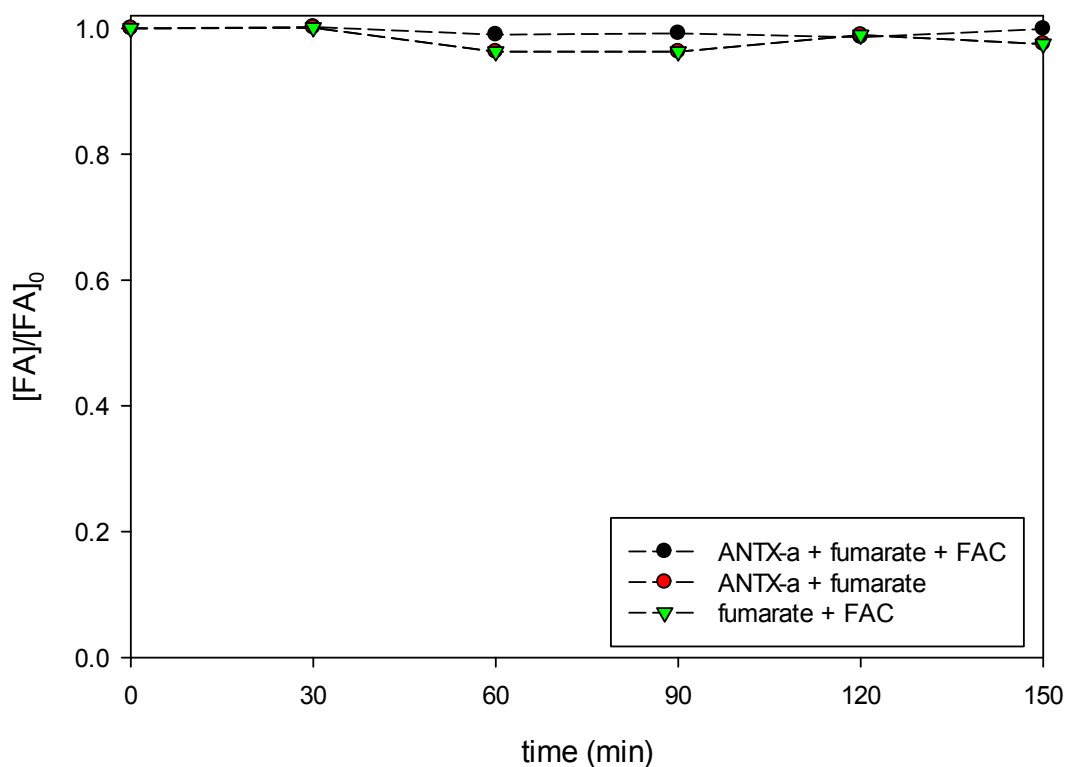

229 **Figure S14.** Effect of chlorine on fumaric acid (FA). ([ANTX-a-Fumarate] = 5 mg/L, pH=7).  
 230

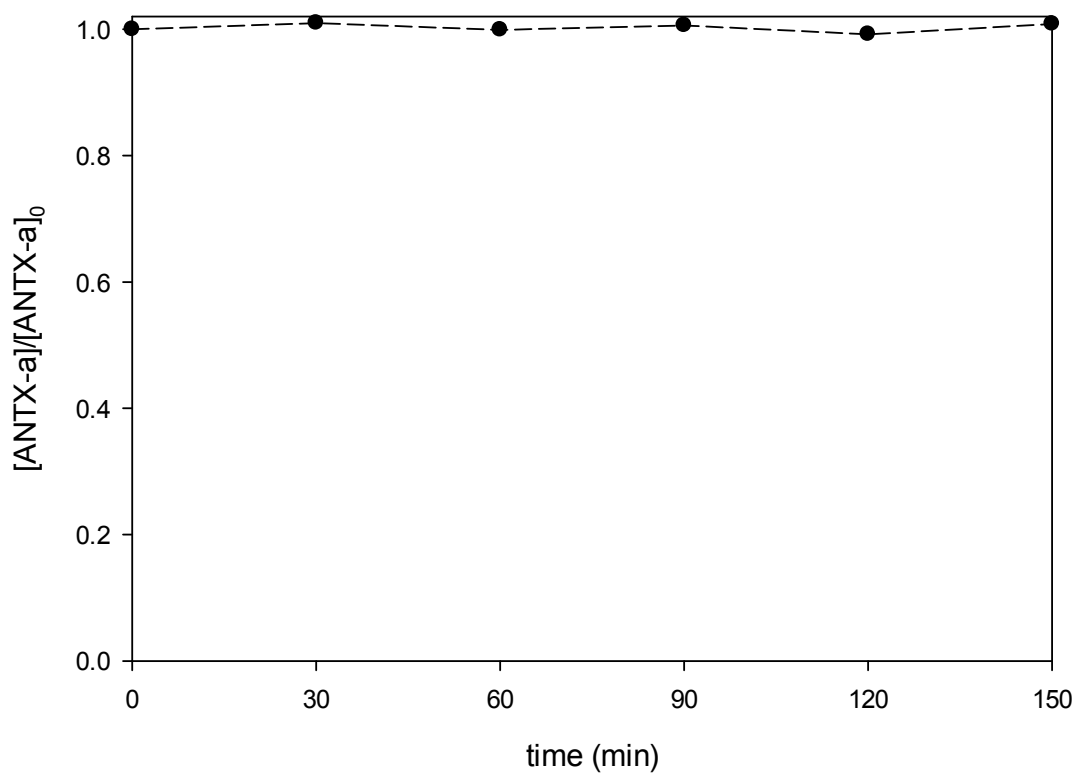

231 **Figure S15.** Stability of ANT-X-a during the experimental period. (T=25 °C, [ANTX-a-  
 232 fumarate] = 5 mg/L, pH=7).  
 233

## Section S9. Direct UV Photolysis of ANTX-a

For each experiment with ANTX-a, a solution containing 6 mL of ANTX-a (fumarate) at 5 mg/L in 20 mM phosphate buffer was prepared and contained in a plastic Petri dish with a diameter of 4.7 cm. 250  $\mu$ L samples were collected and placed into an HPLC vial at a time interval of 15 min under the collimated beam UV<sub>254</sub> device. Changes in solution volume and the volume of the stirring bar were considered in the calculation of the dose applied to the solution. The pH was adjusted with NaOH and HCl. Solution pH was measured before and after each experiment. It was anticipated that absorption spectra would demonstrate pH-dependence for ANTX-a because of the acid/base behavior of their functional groups. The absorption spectra of ANTX-a measured for  $200 \text{ nm} \leq \lambda \leq 400 \text{ nm}$  are shown in Fig. S16 below.

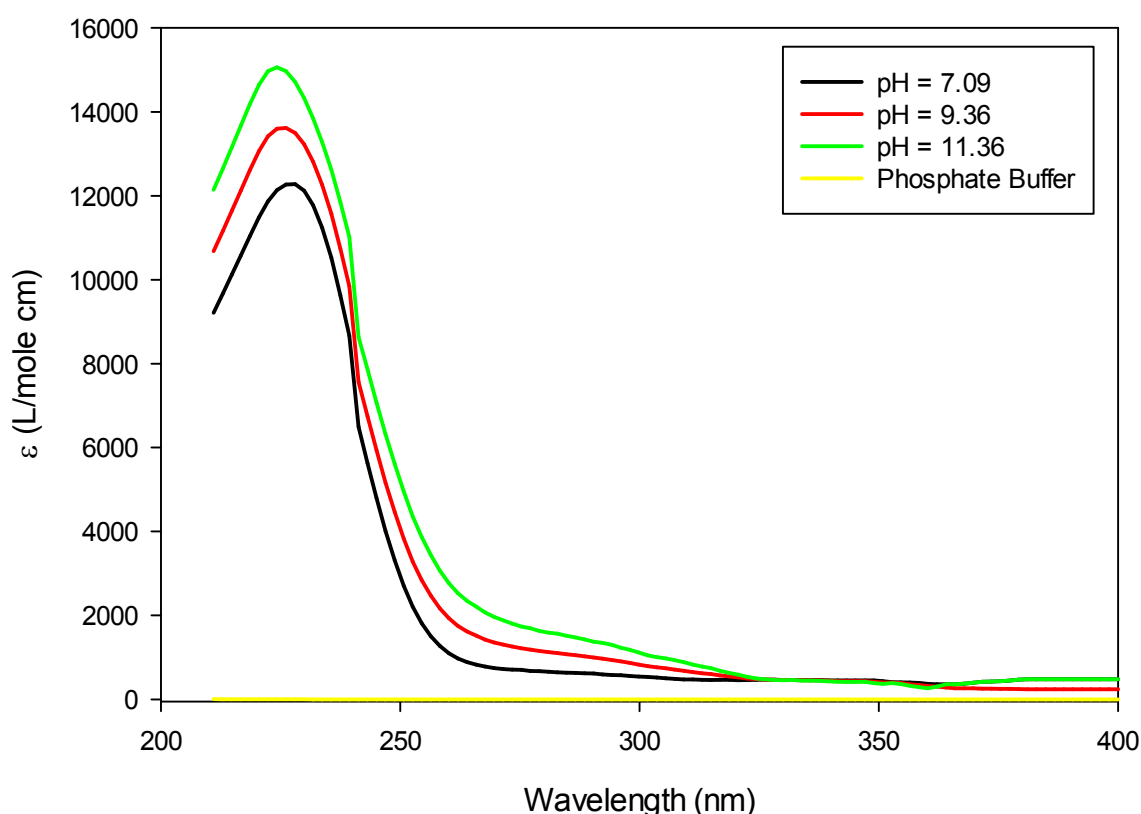

**Figure S16.** UV Absorption Spectra of ANTX-a at several pH values near to its  $pK_a$  (9.36). Phosphate buffer do not absorb comparable UV radiation to ANTX-a at all three pHs. (T=25 °C, 10 mM phosphate buffer, [ANTX-a-Fumarate] = 1 mg/L, Subtracting Effect of Fumaric Acid).

## Section S10. UV Photodegradation of Cl-ANTX-a

Considering the possible loss of free chlorine under a collimated beam UV reactor in a fume hood, a capillary UV reactor was chosen as the device for UV exposure in treating Cl-ANTX-a. Encouraged by the similar behaviors of ANTX-a and DMA in chlorination, several stock solutions of a 100-mL volume containing known Cl:N molar ratios were freshly prepared for Cl-ANTX-a with a Cl:N molar ratio of 1.4, as discussed in Section 3.1.2. A freshly prepared Cl-ANTX-a solution ( $[\text{ANTX-a}]_0 = 3.55 \times 10^{-6} \text{ M}$ , 10 mM phosphate buffer, pH=7.0) was sealed with multiple layers of Parafilm (Flinn Scientific) and injected into the capillary UV reactor connected at a flow rate of 2 mL/min. Notice that for solutions of Cl-ANTX-a and the actinometer, the absorbance was controlled to be close to 0, so that their degradation could be approximated as first-order; this also ensured that the fluence rate field within the reactor was essentially identical for experiments with both compounds. This allowed direct comparison of the data from experiments with Cl-ANTX-a and the actinometer. 10 mins of injection were conducted before collection of treated solution, to avoid any influence caused by adsorption on the tubing system. The UV lamp was warmed for at least 20 min. Flow rates of 8.0, 5.0, 3.0, and 2.0 mL/min were then established by using the pre-calibrated settings on the pump, and the solution was injected into the capillary UV reactor. After each sample collection, 1 mL was transferred into an HPLC vial (for determination of residual fumaric acid), and the rest of the solution was diluted by a factor of two, then subjected to the DPD/KI colorimetric assay to determine the residual free and combined chlorine. In this method, the readings by the DPD/KI method for combined +1 valent chlorine were used as a surrogate measurement for the concentration of Cl-ANTX-a. A standard curve obtained through this method is shown in Fig. S12.

Cl-DMA solutions ( $[\text{Cl-DMA}]_0 = 7.04 \times 10^{-5} \text{ M}$ , 10 mM phosphate buffer, pH=7.0) were freshly prepared for each experiment and injected into the capillary UV system connected directly to MIMS. As with the experiments described above for Cl-ANTX-a, the absorbance of Cl-DMA and actinometer solutions was controlled to be close to 0, so that their degradation could be approximated as first-order and the results of two compounds could be compared directly. For each known UV dose applied to the Cl-DMA solution, MIMS was used to quantify the concentration of [Cl-DMA]. A standard curve of [Cl-DMA] for the MIMS system is shown in Fig. S6. A control experiment was conducted with the UV lamp off; no change in [Cl-DMA] was observed under this condition.

### Section S11. Stability of Cl-ANTX-a

Since a DPD/KI test from Heeb et al. indicated only a 7% loss in Cl-DMA over a period of 24 h when the stock solution was stored in the dark, self-decay of Cl-DMA was not considered over the experimental period.<sup>10</sup>

Several experiments were carried out and tested by HPLC to verify the stability of chlorinated ANTX-a. In these experiments, thiosulfate and/or free chlorine were added (see scenario descriptions in caption for Fig. S17). As shown in Fig. S17, comparison of scenarios A and B illustrated the effect of sodium thiosulfate on ANTX-a; no effect was observed. Also, comparison of scenarios B and C indicated that chlorination occurred on a position that could be reversed by thiosulfate. As this behavior of the chlorination of ANTX-a was similar to that of DMA, and as the behavior was quite consistent with N-chlorination, it was assumed that the primary location for chlorine substitution of ANTX-a was on the secondary amine, as with DMA, and the main product was Cl-ANTX-a.

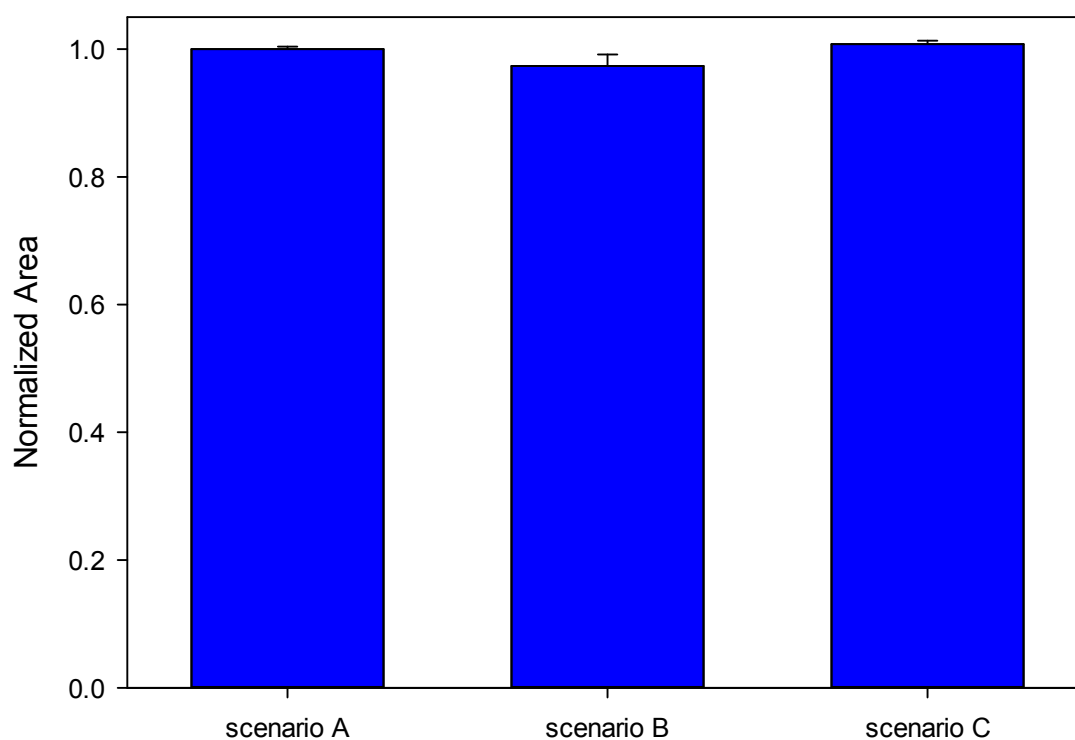

**Figure S17.** Consistency of HPLC analysis for Cl-ANTX-a with sodium thiosulfate.

Scenario A: no free chlorine, no thiosulfate; Scenario B: only thiosulfate; Scenario C: free chlorine and thiosulfate; (Normalized to Scenario A. [Cl-ANTX-a] = 3.6  $\mu$ M, corresponding to 1 mg/L of ANTX-a-Fumarate, pH at 7.00, T=25  $^{\circ}$ C, error bars represent standard deviation of two analyses).

The DPD/KI colorimetric assays illustrated that chlorination of ANTX-a reached completion after 60 min. Time-course samples were collected and analyzed by HPLC with sodium thiosulfate and DPD/KI colorimetric method and it was expected that over the experimental period Cl-ANTX-a would be stable. As shown in Fig. S19, the consistent readings by HPLC and the absorption at 515 nm in the DPD/KI colorimetric method

317 throughout the experimental period indicated that Cl-ANTX-a has little ability to self-degrade,  
318 at least on the timescale of these experiments.

319  
320

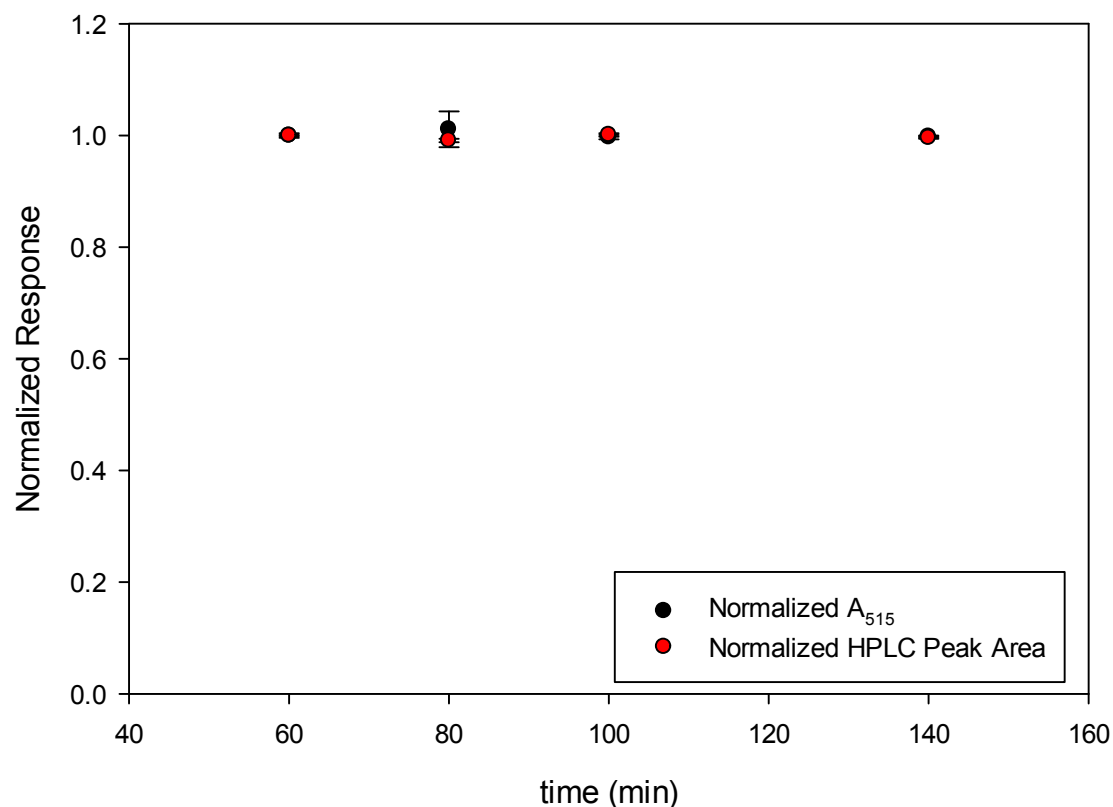

321

322 **Figure S18.** Stability of Cl-ANTX-a during an 80-min experimental period.  
323 (Normalized to readings at t = 60 min. [Cl-ANTX-a] =  $3.6 \times 10^{-6}$  M, corresponding to 1  
324 mg/L of ANTX-a-Fumarate, pH at 7.00, T=25 °C, error bars represent standard deviation of  
325 two analyses).  
326

327 **Section S12.** Absorption Spectra of ANTX-a and N-Chloro-ANTX-a (pH at 7)

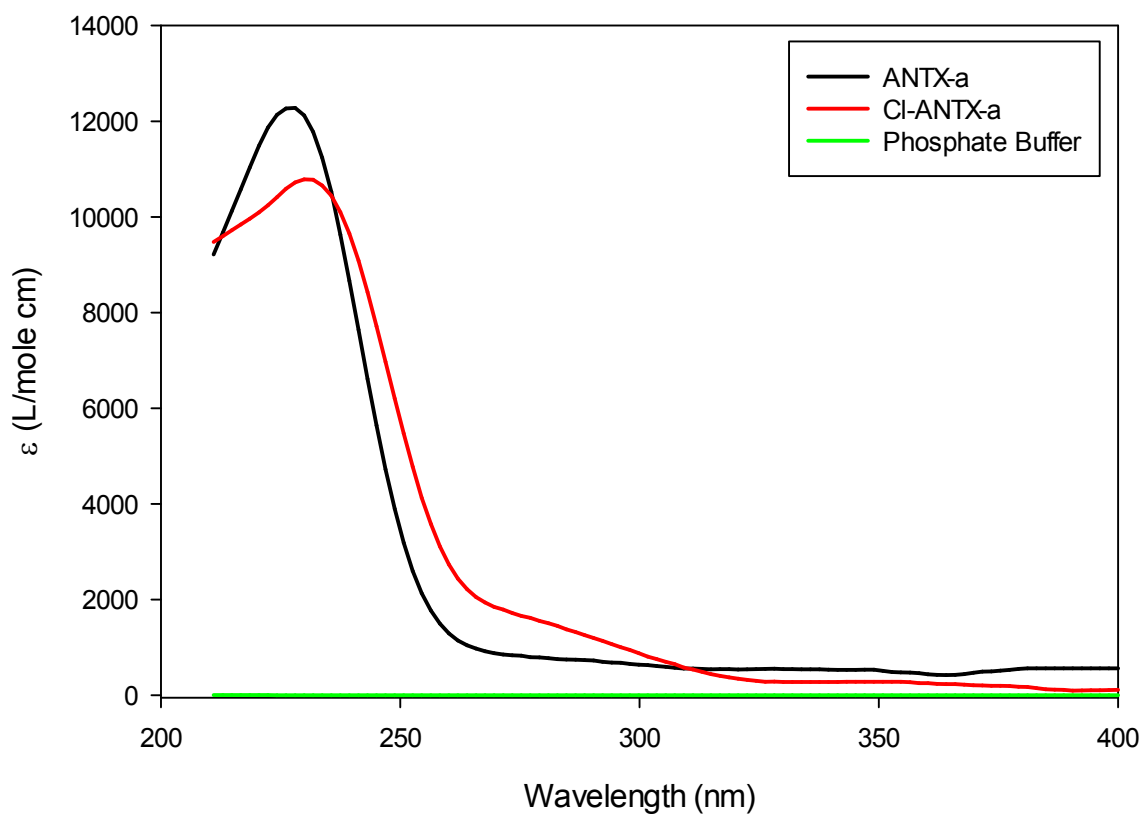

328  
329  
330 **Figure S19.** Absorption Spectra of ANTX-a and Cl-ANTX-a (pH=7.00, 10 mM phosphate  
331 buffer, T=25 °C,  $[C]_0 = 3.6 \times 10^{-6}$  M).

## References

- 1 M. Li, Z. Qiang, P. Hou, J. R. Bolton, J. Qu, P. Li and C. Wang, VUV/UV/Chlorine as an Enhanced Advanced Oxidation Process for Organic Pollutant Removal from Water: Assessment with a Novel Mini-Fluidic VUV/UV Photoreaction System (MVPS), *Environ. Sci. Technol.*, 2016, **50**, 5849–5856.
- 2 S. Jin, A. a Mofidi, M. Asce and K. G. Linden, Polychromatic UV Fluence Measurement Using Chemical Actinometry, Biosimetry, and Mathematical Techniques, *J. Environ. Eng.*, 2006, **132**, 831–842.
- 3 P. A. Swenson and R. B. Setlow, Kinetics of Dimer Formation and Photohydration in Ultraviolet-Irradiated Polyuridylic Acid, *Photochem. Photobiol.*, 1963, **2**, 419–434.
- 4 J. R. Bolton, I. Mayor-Smith and K. G. Linden, Rethinking the Concepts of Fluence (UV Dose) and Fluence Rate: The Importance of Photon-based Units - A Systemic Review, *Photochem. Photobiol.*, 2015, **91**, 1252–1262.
- 5 R. L. . Sinsheimer, The Photochemistry of Uridylic Acid, 1954, **1**, 505–513.
- 6 B. K. G. Linden and J. L. Darby, Estimating Effective Germicidal Dose from Medium Pressure UV Lamps, 1997, **123**, 1142–1149.
- 7 C. Shang and E. R. Blatchley, Differentiation and quantification of free chlorine and inorganic chloramines in aqueous solution by MIMS, *Environ. Sci. Technol.*, 1999, **33**, 2218–2223.
- 8 S. Methods, *Standard methods for the examination of water and wastewater, Standard methods for the examination of water and wastewater*, 1998.
- 9 E. Rodríguez, A. Sordo, J. S. Metcalf and J. L. Acero, Kinetics of the oxidation of cylindrospermopsin and anatoxin-a with chlorine, monochloramine and permanganate, *Water Res.*, 2007, **41**, 2048–2056.
- 10 M. B. Heeb, I. Kristiana, D. Trogolo, J. S. Arey and U. von Gunten, Formation and reactivity of inorganic and organic chloramines and bromamines during oxidative water treatment, *Water Res.*, 2017, **110**, 91–101.
